# Supplementary material for: Normalization strategies differently affect circulating miRNA profile associated with the training status
Source: PubMed Central journal article supplement (PMC6367481; doi:10.1038/s41598-019-38505-x), 2019-02-07
Supplement: 41598_2019_38505_MOESM2_ESM.pdf [file 41598_2019_38505_MOESM2_ESM.pdf]

## **Normalization strategies differently affect circulating miRNA profile associated with the training status**

Martina Faraldi<sup>1</sup> \*, Marta Gomarasca<sup>1</sup>, Veronica Sansoni<sup>1</sup>, Silvia Perego<sup>1</sup>, Giuseppe Banfi<sup>1,2</sup>, Giovanni Lombardi<sup>1</sup>

1. Laboratory of Experimental Biochemistry & Molecular Biology, IRCCS Istituto Ortopedico Galeazzi, Milano, Italia
2. Vita-Salute San Raffaele University, Milano, Italia

**Supplementary Table 1. List of the most stable miRNAs ranked by NormFinder.**

| <b>NAME</b>            | <b>ACCESSION NUMBER</b> | <b>GENOME CONTEXT</b> | <b>CLUSTER</b>                                                                                 |
|------------------------|-------------------------|-----------------------|------------------------------------------------------------------------------------------------|
| <b>hsa-miR-21-5p</b>   | MIMAT0000076            | chr17                 | -                                                                                              |
| <b>hsa-miR-126-3p</b>  | MIMAT0000445            | chr9                  | -                                                                                              |
| <b>hsa-miR-125a-5p</b> | MIMAT0000443            | chr19                 | hsa-miR-99b, hsa-let-7e, hsa-miR-125a                                                          |
| <b>hsa-miR-590-5p</b>  | MIMAT0003258            | chr7                  | -                                                                                              |
| <b>hsa-miR-26b-5p</b>  | MIMAT0000083            | chr2                  | -                                                                                              |
| <b>hsa-miR-320d</b>    | MI0008190               | chr13                 | -                                                                                              |
| <b>hsa-miR-23a-3p</b>  | MIMAT0000078            | chr19                 | hsa-miR-23a, hsa-miR-27a, hsa-miR-24-2                                                         |
| <b>hsa-miR-146a-5p</b> | MIMAT0000449            | chr5                  | -                                                                                              |
| <b>hsa-miR-223-3p</b>  | MIMAT0000280            | chrX                  | -                                                                                              |
| <b>hsa-miR-93-5p</b>   | MIMAT0004509            | chr7                  | hsa-miR-106b, hsa-miR-93, hsa-miR-25                                                           |
| <b>hsa-miR-22-3p</b>   | MIMAT0000077            | chr17                 | -                                                                                              |
| <b>hsa-miR-30e-5p</b>  | MIMAT0000692            | chr1                  | hsa-miR-30e, hsa-miR-30c-1                                                                     |
| <b>hsa-let-7g-5p</b>   | MIMAT0000414            | chr3                  | -                                                                                              |
| <b>hsa-miR-18a-5p</b>  | MIMAT0000072            | chr13                 | hsa-miR-17, hsa-miR-18a, hsa-miR-19a, hsa-miR-20a, hsa-miR-19b-1, hsa-miR-92a-1                |
| <b>hsa-miR-142-5p</b>  | MIMAT0000433            | chr17                 | hsa-miR-4736, hsa-miR-142                                                                      |
| <b>hsa-miR-374b-5p</b> | MIMAT0004955            | chrX                  | hsa-miR-374c, hsa-miR-374b, hsa-miR-421                                                        |
| hsa-miR-19a-3p         | MIMAT0000073            | chr13                 | hsa-miR-17, hsa-miR-18a, hsa-miR-19a, hsa-miR-20a, hsa-miR-19b-1, hsa-miR-92a-1                |
| <b>hsa-miR-199a-3p</b> | MIMAT0000232            | chr19<br>chr1         | -<br>hsa-miR-199a-2, hsa-miR-3120, hsa-miR-214                                                 |
| hsa-miR-25-3p          | MIMAT0000081            | chr7                  | hsa-miR-106b, hsa-miR-93, hsa-miR-25                                                           |
| <b>hsa-miR-150-5p</b>  | MIMAT0000451            | chr19                 | -                                                                                              |
| <b>hsa-miR-145-5p</b>  | MIMAT0000437            | chr5                  | hsa-miR-143, hsa-miR-145                                                                       |
| hsa-miR-24-3p          | MIMAT0000080            | chr9<br>chr19         | hsa-miR-23b, hsa-miR-27b, hsa-miR-3074, hsa-miR-24-1<br>hsa-miR-23a, hsa-miR-27a, hsa-miR-24-2 |
| <b>hsa-miR-106a-5p</b> | MIMAT0000103            | chrX                  | hsa-miR-106a, hsa-miR-18b, hsa-miR-20b, hsa-miR-19b-2, hsa-miR-92a-2, hsa-miR-363              |
| <b>hsa-miR-185-5p</b>  | MIMAT0000455            | chr22                 | -                                                                                              |

|                        |              |       |                                                                                 |
|------------------------|--------------|-------|---------------------------------------------------------------------------------|
| <b>hsa-miR-197-3p</b>  | MIMAT0000227 | chr1  | -                                                                               |
| <b>hsa-miR-766-3p</b>  | MIMAT0003888 | chrX  | -                                                                               |
| <b>hsa-miR-192-5p</b>  | MIMAT0000222 | chr11 | hsa-miR-6750, hsa-miR-194-2, hsa-miR-192                                        |
| <b>hsa-miR-425-5p</b>  | MIMAT0003393 | chr3  | hsa-miR-191, hsa-miR-425                                                        |
| <b>hsa-miR-151a-5p</b> | MIMAT0004697 | chr8  | -                                                                               |
| <b>hsa-miR-30d-5p</b>  | MIMAT0000245 | chr8  | hsa-miR-30d, hsa-miR-30b                                                        |
| <b>hsa-miR-222-3p</b>  | MIMAT0000279 | chrX  | hsa-miR-222, hsa-miR-221                                                        |
| <b>hsa-miR-27b-3p</b>  | MIMAT0000419 | chr9  | hsa-miR-23b, hsa-miR-27b, hsa-miR-3074, hsa-miR-24-1                            |
| hsa-miR-106b-5p        | MIMAT0000680 | chr7  | hsa-miR-106b, hsa-miR-93, hsa-miR-25                                            |
| <b>hsa-let-7b-5p</b>   | MIMAT0000063 | chr22 | hsa-let-7a-3, hsa-mir-4763, hsa-let-7b                                          |
| hsa-miR-19b-3p         | MIMAT0000074 | chr13 | hsa-miR-17, hsa-miR-18a, hsa-miR-19a, hsa-miR-20a, hsa-miR-19b-1, hsa-miR-92a-1 |
|                        |              | chrX  | hsa-miR106a, hsa-miR-18b, hsa-miR-20b, hsa-miR19b-2, hsa-miR-92a-2, hsa-miR363  |
| <b>hsa-miR-484</b>     | MI0002468    | chr16 | -                                                                               |
| hsa-miR-191-5p         | MIMAT0000440 | chr3  | hsa-miR-191, hsa-miR-425                                                        |
| hsa-miR-20a-5p         | MIMAT0000075 | chr13 | hsa-miR-17, hsa-miR-18a, hsa-miR-19a, hsa-miR-20a, hsa-miR-19b-1, hsa-miR-92a-1 |
| <b>hsa-miR-423-5p</b>  | MIMAT0004748 | chr17 | hsa-miR-432, hsa-miR-3184                                                       |
| <b>hsa-let-7i-5p</b>   | MIMAT0000415 | chr12 | -                                                                               |
| hsa-miR-30b-5p         | MIMAT0000420 | chr8  | hsa-miR-30d, hsa-miR-30b                                                        |

The table shows the 41 most stable gene ranked by NormFinder. For each miRNA accession number, genome context, and cluster belongings are indicated. In bold are pointed out the first stable miRNAs of each cluster, namely the 33 miRNAs, considered in normalization
